# Supplementary material for: Development and Application of Healthiness Indicators for Commercial Establishments That Sell Foods for Immediate Consumption
Source: MDPI journal article supplement (doi:10.3390/foods10061434), 2021-06-21
Supplement: s1 [file s1]

# UNIVERSITY FOOD ENVIRONMENT EVALUATION QUESTIONNAIRE

University: \_\_\_\_\_ (ID: \_\_\_\_\_)  
 Assessor: \_\_\_\_\_ (ID: \_\_\_\_\_)  
 Establishment: \_\_\_\_\_ (ID: \_\_\_\_\_)  
 \_\_\_\_\_ (ID Quest. \_\_\_\_\_)  
 Date: \_\_\_\_ / \_\_\_\_ / \_\_\_\_  
 Start time: \_\_\_\_ : \_\_\_\_  
 End time: \_\_\_\_ : \_\_\_\_

## CHARACTERIZATION OF ESTABLISHMENT

### 1. TYPE OF ESTABLISHMENT:

- (1) Buffet restaurant by weight
- (2) À la carte/fixed dish restaurants
- (3) All-you-can-eat buffet restaurants, fixed price
- (4) Snack bar
- (5) Bar
- (6) Cafeteria
- (7) Candy store
- (8) Mixed (snack bars or cafeterias and buffet by weight or la carte/fixed dish restaurants)

### 2. LOCATION OF ESTABLISHMENT

- (1) Within the university (2) In surrounding area

### 3. THE ESTABLISHMENT OFFERS (you may choose more than one option):

- (1) Snacks (2) Meals (3) items from candy store

#### 3.1 In the case of MEALS (you may choose more than one option):

- |                    |                             |
|--------------------|-----------------------------|
| (1) A la carte     | (5) Portioned Buffet        |
| (2) Meal by weight | (6) Daily special/Full meal |
| (3) Free Buffet    | (7) Eat-as-much-as you-can  |
| (4) Mixed Buffet   | (8) Other                   |
|                    | (_____)                     |

### 4. OPENING HOUR of the establishment:

- 4.1. Monday to Friday (0) No (1) Yes

4.1.1 Opens \_\_\_\_ 4.1.2 Closes \_\_\_\_

- 4.2. Saturday (0) No (1) Yes

4.2.1 Opens \_\_\_\_ 4.2.2 Closes \_\_\_\_

- 4.3. Sunday (0) No (1) Yes

4.3.1 Opens \_\_\_\_ 4.3.2 Closes \_\_\_\_

- 4.4. Holidays (0) No (1) Yes

4.4.1 Opens \_\_\_\_ 4.4.2 Closes \_\_\_\_

- 4.5 Other: \_\_\_\_\_

4.5.1 Opens \_\_\_\_ 4.5.2 Closes \_\_\_\_

5. What are the BUSIEST TIME(S) during opening hours between Monday and Friday:

5.1 \_\_\_\_\_ : \_\_\_\_\_ to \_\_\_\_\_ : \_\_\_\_\_

5.2 \_\_\_\_\_ : \_\_\_\_\_ to \_\_\_\_\_ : \_\_\_\_\_

6. Does the place offer alternative FORMS OF PAYMENT (you may choose more than one option):

- |                 |                  |
|-----------------|------------------|
| (1) Cash        | (4) Meal voucher |
| (2) Debit card  | (5) Other        |
| (3) Credit card | (_____)          |

## NOTES ON THE ENVIRONMENT

### 7. DOES THE ESTABLISHMENT HAVE:

- |                                                                                                    |        |         |
|----------------------------------------------------------------------------------------------------|--------|---------|
| 7.1 Micro-wave available for use by customers?                                                     | (0) No | (1) Yes |
| 7.2 Structure (table, counter etc.) for eating in?                                                 | (0) No | (1) Yes |
| 7.3 Freely accessible shelves displaying items such as cookies, desserts, candy, cereal bars?      | (0) No | (1) Yes |
| 7.4 Freely accessible display refrigerators (glass door/ with stickers) for drinks?                | (0) No | (1) Yes |
| 7.5 Freely accessible display freezers (glass door/ with stickers) for ice creams and ice lollies? | (0) No | (1) Yes |
| 7.6 Freely accessible counter for desserts and sweets                                              | (0) No | (1) Yes |
| 7.7 Freely accessible counter for drinks                                                           | (0) No | (1) Yes |
| 7.8 Snacks displayed next to cash desk                                                             | (0) No | (1) Yes |
| 7.9 Water fountain with potable water                                                              | (0) No | (1) Yes |
| 7.10 Free filtered water                                                                           | (0) No | (1) Yes |

*In the case of restaurant serving "meals by weight", free buffet, mixed buffet, portioned buffet or other type of service with display of preparations, respond to questions 8 and 9. In the case of other establishments, mark "Does not apply" to questions 8 and 9 and continue to complete question 10:*

### 8. What is displayed AT THE START OF THE BUFFET FLOW (you may choose more than one option):

- |              |                             |
|--------------|-----------------------------|
| (1) Salads   | (5) Meats/barbeque          |
| (2) Fruits   | (6) Accompaniments          |
| (3) Drinks   | (7) N/A                     |
| (4) Desserts | (8) Other food/preparation: |
|              | (_____)                     |

**9. What is displayed AT THE START OF THE BUFFET FLOW**

*(you may choose more than one option):*

- (1) Salads
- (2) Fruits
- (3) Drinks
- (4) Desserts
- (5) Meats/barbeque
- (6) Accompaniments
- (7) N/A
- (8) Other food/preparation  
(\_\_\_\_\_)

**10. If there are freely accessible shelves displaying food items, WHAT PRODUCTS ARE AVAILABLE *(you may choose more than one option)?***

- (1) Cookies sweets with filling
- (2) Cookies sweets without filling
- (3) Packets of savory snacks or savory cookies without filling (e.g. Clube Social, drink)
- (4) Wholemeal cookies
- (5) Cereal bars
- (6) Candies, sweets, chocolates
- (7) Other sweets (cakes, honey bread, sweetened breakfast cereal)
- (8) N/A
- (9) Other food/preparation  
(\_\_\_\_\_)

**11. If there are display refrigerators (glass door/ with stickers) or freely accessible shelves for drinks, WHAT PRODUCTS ARE AVAILABLE *(you may choose more than one option)?***

- (1) Natural fruit juice (100% Juice)
- (2) Fruit juice or fruit nectar based drinks
- (3) Flavored water (e.g. Aquarius Fresh, Natural Plus and Neutra)
- (4) Coconut water
- (5) Flavored milk or milk-based beverages or industrialized yogurt
- (6) Soy-based drinks
- (7) Tea or mate
- (8) Energy drinks (e.g. Red Bull)
- (9) Sports drinks (e.g. Gatorade)
- (10) Guarana drink
- (11) Sodas (including flavored water)
- (12) N/A
- (13) Other food/preparation  
(\_\_\_\_\_)

**INFORMATION**

**12. Which of the following items are AVAILABLE TO CUSTOMERS:**

- 12.1 Menu: (0) No (1) Yes
- 12.2 Price: (0) No (1) Yes
- 12.3 Nutritional information: (0) No (1) Yes

12.3.1 Energetic value: (0) No (1) Yes

12.3.2 Allergens: (0) No (1) Yes

12.3.3 Macronutrients: (0) No (1) Yes

12.3.4 Micronutrients: (0) No (1) Yes

**12.4 IF YES, for the corresponding item, indicate *(you may choose more than one option):***

**12.4.1 MENU:**

- |                     |                             |
|---------------------|-----------------------------|
| (1) Individual      | (5) Individual menu outside |
| (2) Table display   |                             |
| (3) Banner/totem/TV |                             |
| (4) Internet        | (6) Other<br>(_____)        |

**12.4.2 PRICE:**

- |                     |                             |
|---------------------|-----------------------------|
| (1) Individual      | (5) Individual menu outside |
| (2) Table display   |                             |
| (3) Banner/totem/TV |                             |
| (4) Internet        | (6) Other<br>(_____)        |

**12.4.3 NUTRITIONAL INFORMATION**

- |                     |                             |
|---------------------|-----------------------------|
| (1) Individual      | (5) Individual menu outside |
| (2) Table display   |                             |
| (3) Banner/totem/TV |                             |
| (4) Internet        | (6) Other                   |

**DRINKS, FOODS AND PREPARATIONS**

**13. ARE GREENS AND/OR LEGUMES OFFERED (Do not consider roots and tubercules) *(you may choose more than one option):***

**13.1 RAW?**

(0) No *(go to q13.2)* (1) Yes

**13.1.1 AS COMPOSITE PREPARATIONS ONLY WITH GREENS / LEGUMES?**

(0) No (1) Yes

**13.1.2 AS PART OF PREPARATIONS?**

(0) No (1) Yes

**13.2 COOKED (including soups)?**

(0) No *(go to q14)* (1) Yes

**13.2.1 AS COMPOSITE PREPARATIONS ONLY WITH GREENS / LEGUMES?**

(0) No (1) Yes

**13.2.2 AS PART OF MIXED PREPARATIONS:**

(0) No (1) Yes

**13.2.3 AS PART OF PREPARATIONS WITH SAUCE (e.g. white sauce):**

(0) No (1) Yes

**14. IS THERE WHOLE GRAIN RICE?**

(0) No (1) Yes

**15. ARE THERE LEGUMES?**

(0) No (1) Yes

**16. ARE THERE CONDIMENTS AND SAUCES:**

(0) No (go to q17) (1) Yes

16.1 Salt? (0) No (1) Yes

16.2 Oil? (0) No (1) Yes

16.3 Olive oil? (0) No (1) Yes

16.4 Readymade dressings (including salad dressing, ketchup, mayonnaise and mustard)?

(0) No (1) Yes

16.5 Homemade dressings?

(0) No (1) Yes

16.6 Soy sauce?

(0) No (1) Yes

16.7 Other sauces?

(0) No (1) Yes (\_\_\_\_\_)

**17. ARE THERE SANDWICHES OR CREPES?**

(0) No (1) Yes

**18. ARE THERE FRIED/BAKED SAVORY SNACKS?**

(0) No (1) Yes

**19. ARE THERE FRESH FRUITS OR FRUIT SALADS?**

(0) No

(1) Yes, throughout the day

(2) Yes, only during main meals

**20. IS THERE WATER FOR SALE?**

(0) No (1) Yes

**21. ARE THERE NATURAL FRUIT JUICES OR PREPARED WITH FROZEN PULP (you may choose more than one option)?**

(0) No (1) Yes, unsweetened (2) Yes, ready sweetened

**22. ARE THERE INDUSTRIALIZED JUICES IN COOLERS/BOTTLES (you may choose more than one option)?**

(0) No (1) Yes, unsweetened (2) Yes, ready sweetened

**23. IS THERE SUGAR ON THE TABLES?**

(0) No (1) Yes

**24. IS THERE SWEETENER?**

(0) No (1) Yes

**CONVENIENCE ITEMS  
(INCLUDING CANDY STORE)****25. ARE THERE:****NO. OF  
DIFFERENT  
TYPES**

25.1 Candy and chocolate bars (0) No (1) Yes \_\_\_\_\_

25.2 Candy (including chewing gum) (0) No (1) Yes \_\_\_\_\_

25.3 Cereal bars (0) No (1) Yes \_\_\_\_\_

25.4 Breakfast cereal (0) No (1) Yes \_\_\_\_\_

25.5 Cream-filled cookies (0) No (1) Yes \_\_\_\_\_

25.6 Cookies without filling (0) No (1) Yes \_\_\_\_\_

25.7 Packaged savory snacks or crackers without filling (0) No (1) Yes \_\_\_\_\_

25.8 Whole grain cookies (0) No (1) Yes \_\_\_\_\_

25.9 Other sweet (honey bread, cake, muffin,) (0) No (1) Yes \_\_\_\_\_

25.10 Flavored water (e.g. Aquarius Fresh, Natural Plus and Neutra) (0) No (1) Yes \_\_\_\_\_

25.11 Coconut water (0) No (1) Yes \_\_\_\_\_

25.12 Soda (including H2O) (0) No (1) Yes \_\_\_\_\_

25.13 Fruit juice or fruit nectar based drinks (0) No (1) Yes \_\_\_\_\_

25.14 Ready-to-drink tea (e.g. Ice Tea, mate) (0) No (1) Yes \_\_\_\_\_

25.15 Sports drinks (Gatorade) (0) No (1) Yes \_\_\_\_\_

25.16 Energetic (e.g. Red Bull) (0) No (1) Yes \_\_\_\_\_

25.17 Guarana drink (0) No (1) Yes \_\_\_\_\_

25.18 Soy-based industrialized beverage (0) No (1) Yes \_\_\_\_\_

25.19 Flavored milk or milk-based beverages or industrialized yogurt (0) No (1) Yes \_\_\_\_\_

25.20 Alcoholic drinks (0) No (1) Yes \_\_\_\_\_

25.21 Coffee (self-service) (0) No (1) Yes \_\_\_\_\_

25.22 Others (0) No (1) Yes \_\_\_\_\_  
(\_\_\_\_\_)**26. What is the cost of the SMALLEST PORTION OR CHEAPEST ITEM AVAILABLE AND SOLD SEPARATELY for the following foods:****26.1 Meal**

26.1.1 Daily special: R\$ \_\_\_\_\_ (0) N/A

26.1.2 By weight: R\$ \_\_\_\_\_ (0) N/A

26.2 French fries

26.2.1 Portion: R\$ \_\_\_\_\_ (0) N/A

26.2.2 By weight: R\$ \_\_\_\_\_ (0) N/A

26.3 Fruit or fruit salad (*which ever is cheaper*)

26.3.1 Portion R\$ \_\_\_\_\_ (0) N/A

26.3.2 By weight: R\$ \_\_\_\_\_ (0) N/A

26.4 Cheapest sweet or desert

(*Do not consider candy store item*)

26.4.1 Portion R\$ \_\_\_\_\_ (0) N/A

26.4.2 By weight: R\$ \_\_\_\_\_ (0) N/A

26.5 Sandwich R\$ \_\_\_\_\_ (0) N/A

26.6 Fried savory snack R\$ \_\_\_\_\_ (0) N/A

26.7 Baked savory snack R\$ \_\_\_\_\_ (0) N/A

26.8 Cheapest sweet snack

(*Do not consider candy store item*)

26.8.1 Price: R\$ \_\_\_\_\_ (0) N/A

26.8.2 Weight: \_\_\_\_\_ (0) N/A

26.9 Cereal bar

26.9.1 Price: R\$ \_\_\_\_\_ (0) N/A

26.9.2 Weight: \_\_\_\_\_ (0) N/A

26.10 Filled sweet cookie

26.10.1 Price: R\$ \_\_\_\_\_ (0) N/A

26.10.2 Weight: \_\_\_\_\_ (0) N/A

26.11 Unfilled sweet cookie

26.11.1 Price: R\$ \_\_\_\_\_ (0) N/A

26.11.2 Weight: \_\_\_\_\_ (0) N/A

26.12 Packets of savory snacks or unfilled savory cookies

26.12.1 Price: R\$ \_\_\_\_\_ (0) N/A

26.12.2 Weight: \_\_\_\_\_ (0) N/A

26.13. Whole grain cookies

26.13.1 Price: R\$ \_\_\_\_\_ (0) N/A

26.13.2 Weight: \_\_\_\_\_ (0) N/A

**27. What is the cheapest item AVAILABLE AND SOLD SEPARATELY OF THE FOLLOWING DRINKS:**

27.1 Soda

Volume: \_\_\_\_\_ ml

R\$ \_\_\_\_\_ (0) N/A

**PRICES AND PROMOTIONS**

27.2 Juice/natural guarana / ice tea/ mate

Volume: \_\_\_\_\_ ml

R\$ \_\_\_\_\_ (0) N/A

27.3 Natural or pulp fruit juice (300 ml)

R\$ \_\_\_\_\_ (0) N/A

27.4 Industrialized fruit juice (100%) (300 ml)

R\$ \_\_\_\_\_ (0) N/A

27.5 Nectar (e.g. Sufresh, Del Vale, Da Fruta) (350 ml)

R\$ \_\_\_\_\_ (0) N/A

27.6 Juice based drinks (200 ml) (Kapo)

R\$ \_\_\_\_\_ (0) N/A

27.7 Mineral water

Volume: \_\_\_\_\_ ml

R\$ \_\_\_\_\_ (0) N/A

27.8 Sport drink (Isotonic/replacement drinks) (500ml)

R\$ \_\_\_\_\_ (0) N/A

27.9 Energy drinks (200-300ml)

R\$ \_\_\_\_\_ (0) N/A

27.10 Soy based drinks (200ml)

R\$ \_\_\_\_\_ (0) N/A

27.11 Milk based or derivate drinks (includes yoghurt and fermented milk)

Volume: \_\_\_\_\_ ml

R\$ \_\_\_\_\_ (0) N/A

27.12 Mixed milk and fruit drinks

Volume: \_\_\_\_\_ ml

R\$ \_\_\_\_\_ (0) N/A

27.13 Alcoholic drinks (350ml)

R\$ \_\_\_\_\_ (0) N/A

**28. Is there the option of asking for LARGER PORTIONS OF FOODS AND DRINKS OFFERED? (e.g. choose 500 ml soda instead of 350ml or have 200g more fries)**

(0) No (1) Yes

28.1 If YES, theses prices are proportionally:

(1) Lower (2) the same (3) Higher

**29. Is there the option of ASKING FOR ½ PORTION OR REDUCED PORTIONS?**

(0) No (1) Yes (2) N/A

29.1 If YES, theses prices are proportionally:

(1) Lower (2) the same (3) Higher

**30.** Does the place OFFER COMBO/PROMOTION OPTION WITH END PRICE LOWER THAN THE SUM OF PRICES OF EACH COMPONENT OF THE COMBINATION?

(0) No (1) Yes (2) N/A

**31.** Is there the option of SUBSTITUTING FRIES FROM THE SPECIAL/READY/COMBOS/PROMOTIONS WITH SALAD OR GREENS/ COOKED LEGUMES AT NO EXTRA COST?

(0) No (1) Yes (2) N/A

**32.** Does the establishment offer the option of SUBSTITUTING RICE FROM THE SPECIAL/READY/COMBOS/PROMOTIONS WITH WHOLE GRAIN RICE AT NO EXTRA COST?

(0) No (1) Yes (2) N/A

**33.** Does the establishment offer the option of SUBSTITUTING WHITE BREAD FROM THE SPECIAL/READY/COMBOS/PROMOTIONS WITH WHOLE GRAIN BREAD AT NO EXTRA COST?

(0) No (1) Yes (2) N/A

**34.** Does the establishment offer the option of SUBSTITUTING THE SODA FROM THE COMBOS/PROMOTIONS WITH FRESH OR PREPARED NATURAL JUICES WITH FROZEN PULP OR WITH WATER, AT NO EXTRA COST?

(0) No (1) Yes (2) N/A

**35.** Does the place offer PROMOTIONAL/SUBSIDIZED PRICES FOR UNIVERSITY STUDENTS?

(0) No (1) Yes

### ADVERTISING

*NB. Use the table below to fill in the forms of presentation of advertising*

| Form of presentation             |
|----------------------------------|
| (1) banner/supplier sign         |
| (2) banner/sign of establishment |
| (3) uniform                      |
| (4) replica of product           |
| (5) menu                         |
| (6) on the product               |

**36.** Is there any advertising in the establishment for FRESH FRUIT / FRUIT SALAD /SALADS/NATURAL OR PREPARED JUICES WITH FROZEN PULP?

(0) No (go to q37) (1) Yes

| 36.1 Food/drink | 36.2 Quantity | 36.3 Form of presentation |
|-----------------|---------------|---------------------------|
| 36.1.1          |               |                           |
| 36.1.2          |               |                           |
| 36.1.3          |               |                           |
| 36.1.4          |               |                           |

|        |  |  |
|--------|--|--|
| 36.1.5 |  |  |
| 36.1.6 |  |  |
| 36.1.7 |  |  |
| 36.1.8 |  |  |

MESSAGES (indicate in brackets the no. referring to the items of q 36.1):

\_\_\_\_\_( )  
 \_\_\_\_\_( )  
 \_\_\_\_\_( )  
 \_\_\_\_\_( )  
 \_\_\_\_\_( )  
 \_\_\_\_\_( )  
 \_\_\_\_\_( )  
 \_\_\_\_\_( )  
 \_\_\_\_\_( )

**37.** Is there any advertising in the establishment for INDUSTRIALIZED DRINKS?

(0) No (go to q38) (1) Yes

| 37.1 Food/drink | 37.2 Quantity | 37.3 Form of presentation |
|-----------------|---------------|---------------------------|
| 37.1.1          |               |                           |
| 37.1.2          |               |                           |
| 37.1.3          |               |                           |
| 37.1.4          |               |                           |
| 37.1.5          |               |                           |
| 37.1.6          |               |                           |
| 37.1.7          |               |                           |
| 37.1.8          |               |                           |

MESSAGES (indicate in brackets the no. referring to item 37.1):

\_\_\_\_\_( )  
 \_\_\_\_\_( )  
 \_\_\_\_\_( )  
 \_\_\_\_\_( )  
 \_\_\_\_\_( )  
 \_\_\_\_\_( )  
 \_\_\_\_\_( )  
 \_\_\_\_\_( )  
 \_\_\_\_\_( )

38. Is there any advertising in the establishment for DESSERTS/ICE CREAMS?

(0) No (Review filling in and note the time of finishing)

(1) Yes

| 38.1 Food/drink | 38.2 Quantity | 38.3 Form of presentation |
|-----------------|---------------|---------------------------|
| 38.1.1          |               |                           |
| 38.1.2          |               |                           |
| 38.1.3          |               |                           |
| 38.1.4          |               |                           |
| 38.1.5          |               |                           |
| 38.1.6          |               |                           |
| 38.1.7          |               |                           |
| 38.1.8          |               |                           |

MESSAGES (indicate in brackets the no. referring to q 38.1):

(

)

(

)

(

)

(

)

(

)

(

)

(

)

(

)

(

)

Review filling in and note the time of finishing

General comments:
